# Supplementary material
Source: Research Square preprint supplement (doi:10.21203/rs.3.rs-10112141/v1)

Figure S1A

### Bellmunt score

### Modified Bellmunt score

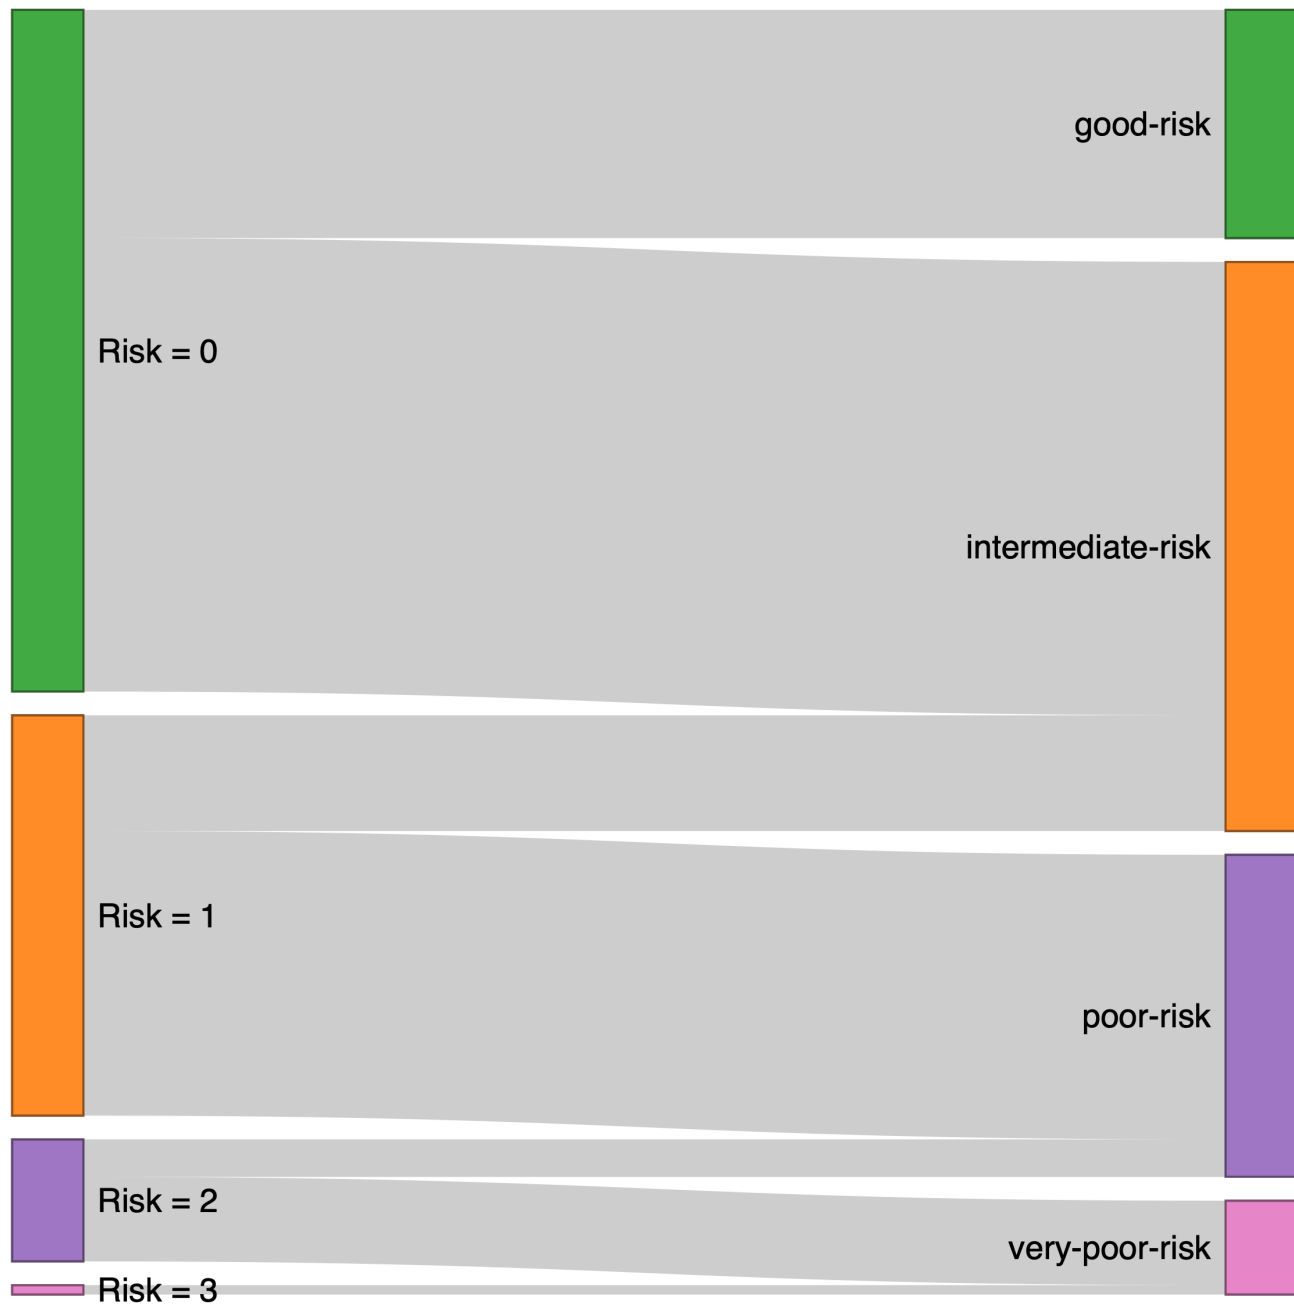

Figure S1B

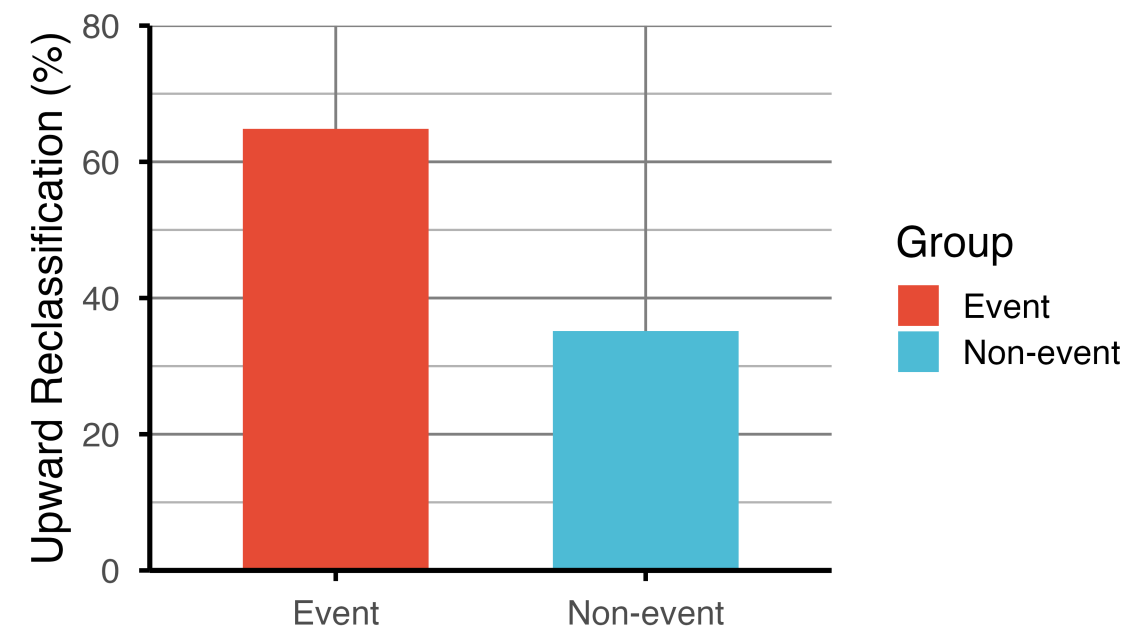

Supplement: Supplementary file 1 [file 0554456821f33aa8ac0c4d90.pdf]
